# Supplementary material for: Long-term immune response after SARS-CoV2 vaccination in solid organ transplant recipients
Source: Springer Nature journal article supplement (doi:10.1186/s12879-024-10377-1), 2025-04-25
Supplement: MOESM1 [file 12879_2024_10377_MOESM1_ESM.docx]

Supplementary Table 1. Comparison of the immune response pattern groups.

|  | AbR-CMI Combination | | | |
| --- | --- | --- | --- | --- |
|  | AbR - CMI - | AbR + CMI - | AbR + CMI + | Test |
|  | 12 (16.4%) | 21 (28.8%) | 40 (54.8%) |  |
| Age at 1st dose | 57.5 [50.5;67.0] | 59.0 [44.0;68.0] | 56.0 [41.0;64.5] | 0.689 |
| Females |  |  |  |  |
| No | 7 (58.3%) | 13 (61.9%) | 23 (57.5%) | 0.948 |
| Yes | 5 (41.7%) | 8 (38.1%) | 17 (42.5%) |  |
| Time from tpx to 1st dose (years) | 3.1 [1.1;6.8] | 5.0 [1.0;11.8] | 4.6 [2.6;8.4] | 0.381 |
| Time from previous vaccination and CMI (days) | 133.0 [78.5;222.5] | 216.0 [198.0;255.0] | 216.5 [181.0;253.0] | 0.088 |
| Time from previous vaccination and AbR (days) | 133.0 [75.5;222.5] | 216.0 [198.0;255.0] | 216.5 [181.0;253.0] | 0.084 |
| *SOT group* |  |  |  |  |
| Heart | 1 (8.3%) | 0 (0.0%) | 1 (2.5%) | 0.454 |
| Liver | 2 (16.7%) | 6 (28.6%) | 16 (40.0%) |  |
| Lung | 4 (33.3%) | 4 (19.0%) | 6 (15.0%) |  |
| Kidney | 5 (41.7%) | 11 (52.4%) | 17 (42.5%) |  |
| Comorbidities |  |  |  |  |
| No | 7 (58.3%) | 16 (76.2%) | 30 (75.0%) | 0.483 |
| Yes | 5 (41.7%) | 5 (23.8%) | 10 (25.0%) |  |
| *Type of Vaccine* |  |  |  |  |
| Pf-Pf-Mo | 8 (66.7%) | 7 (38.9%) | 26 (68.4%) | 0.233 |
| Mo-Mo-Mo | 3 (25.0%) | 8 (44.4%) | 10 (26.3%) |  |
| Pf-Pf-Pf | 1 (8.3%) | 3 (16.7%) | 2 (5.3%) |  |
| Breakthrough Infection | 3 (25%) | 6 (28.6%) | 13 (32.5%) | 0.675 |
| Graft function at 1st dose |  |  |  |  |
| Good | 12 (100.0%) | 20 (95.2%) | 37 (92.5%) | 1.000 |
| Impaired, failure or other | 0 (0.0%) | 1 (4.8%) | 3 (7.5%) |  |
| Induction Regimen |  |  |  |  |
| Yes | 11 (91.7%) | 21 (100.0%) | 40 (100.0%) | 0.164 |
| No | 1 (8.3%) | 0 (0.0%) | 0 (0.0%) |  |
| Calcineurin Inibithors |  |  |  |  |
| No | 0 (0.0%) | 0 (0.0%) | 1 (2.5%) | 1.000 |
| Yes | 12 (100.0%) | 21 (100.0%) | 39 (97.5%) |  |
| MMF |  |  |  |  |
| No | 5 (41.7%) | 11 (52.4%) | 24 (60.0%) | 0.499 |
| Yes | 7 (58.3%) | 10 (47.6%) | 16 (40.0%) |  |
| mTOR |  |  |  |  |
| No | 10 (83.3%) | 18 (85.7%) | 36 (90.0%) | 0.698 |
| Yes | 2 (16.7%) | 3 (14.3%) | 4 (10.0%) |  |
| Steroids |  |  |  |  |
| No | 1 (8.3%) | 8 (38.1%) | 19 (47.5%) | 0.072 |
| Yes | 11 (91.7%) | 13 (61.9%) | 21 (52.5%) |  |
| CD4 | 948.0 [236.0;957.0] | 586.5 [213.0;814.0] | 546.5 [454.0;803.0] | 0.585 |
| CD4>500 |  |  |  |  |
| No | 1 (33.3%) | 5 (50.0%) | 6 (42.9%) | 1.000 |
| Yes | 2 (66.7%) | 5 (50.0%) | 8 (57.1%) |  |
| CD8 | 420.0 [357.0;1381.0] | 411.0 [187.0;952.0] | 510.0 [346.0;604.0] | 0.862 |
| IgG (mg/dL) | 664.0 [552.0;863.5] | 946.5 [827.0;1093.0] | 1043.5 [983.5;1205.0] | 0.034 |
| IgG > 600 |  |  |  |  |
| No | 1 (25.0%) | 1 (10.0%) | 0 (0.0%) | 0.142 |
| Yes | 3 (75.0%) | 9 (90.0%) | 12 (100.0%) |  |
| Leukocytes | 7.8 [5.6;8.6] | 6.0 [4.0;9.4] | 5.8 [4.3;6.9] | 0.276 |
| Median [iqr]: p-value from Kruskal-Wallis test. Frequency (Percent%): p-value from Pearson test. | | | | |

Abbreviation: Breakthrough Infection (BI), Cellular-mediated Immunity (CMI), Antibody Response (AbR), BNT162b2 Pfizer Vaccine (Pf), mRNA-1273 Moderna Vaccine (Mo), Mycophenolate Mofetil (MMF), Mechanistic Target of Rapamycin (mTOR), Immunoglobulin G (IgG)
